# Supplementary material
Source: publisher figshare collection journal article supplement (https://sage.figshare.com/ndownloader/files/33082495)

Supplement figure 1. The change of hepatic function during rhTPO therapy.

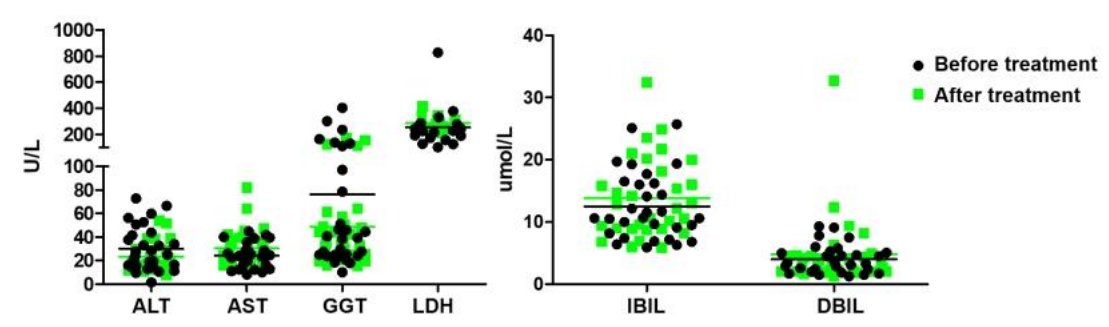

Supplement: Supplementary file 1 [file 33082495]
